# Supplementary material for: R1441G but not G2019S mutation enhances LRRK2 mediated Rab10 phosphorylation in human peripheral blood neutrophils
Source: PubMed Central journal article supplement (PMC8357670; doi:10.1007/s00401-021-02325-z), 2021-06-14
Supplement: 401_2021_2325_MOESM1_ESM.pdf [file 401_2021_2325_MOESM1_ESM.pdf]

## **R1441G but not G201S mutation enhances LRRK2 mediated Rab10 phosphorylation in human peripheral blood neutrophils**

Ying Fan<sup>1</sup>, Raja S. Nirujogi<sup>1</sup>, Alicia Garrido<sup>2,3</sup>, Javier Ruiz Martínez<sup>4</sup>, Alberto Bergareche-Yarza<sup>4</sup>, Elisabet Mondragón Rezola<sup>4</sup>, Ana Vinagre Aragón<sup>4</sup>, Ioana Croitoru<sup>4</sup>, Ana Gorostidi Pagola<sup>4</sup>, Laura Paternain Markinez<sup>4</sup>, Roy Alcalay<sup>5</sup>, Richard A. Hickman<sup>6</sup>, Jonas Duering<sup>1</sup>, Sara Gomes<sup>1</sup>, Neringa Pratusėviciute<sup>1</sup>, Shalini Padmanabhan<sup>7</sup>, Francesc Valldeoriola<sup>2,3</sup>, Leticia Pérez Sisqués<sup>8</sup>, Cristina Malagelada<sup>8,9</sup>, Teresa Ximelis<sup>10</sup>, Laura Molina Porcel<sup>10,11</sup>, Maria José Martí<sup>2,3</sup>, Eduardo Tolosa<sup>2,3</sup>, Dario R Alessi<sup>1</sup>, Esther Sammler\*<sup>1,12</sup>

1. Medical Research Council Protein Phosphorylation and Ubiquitylation Unit, University of Dundee, Dundee, DD1 5EH, UK.
2. Parkinson's disease and Movement Disorders Unit, Neurology Service, Hospital Clínic de Barcelona, Barcelona, Spain.
3. Centro de Investigación Biomédica en Red Sobre Enfermedades Neurodegenerativas (CIBERNED), Hospital Clínic, IDIBAPS, Universitat de Barcelona, Barcelona, Spain.
4. Group of Neurodegenerative Diseases, Biodonostia Health Research Institute, San Sebastian, Spain.
5. Department of Neurology, Columbia University Medical Center, New York, NY, USA.
6. Department of Pathology and Cell Biology, Columbia University Medical Center New York, NY, USA.
7. The Michael J Fox Foundation for Parkinson's Research, New York, NY, USA.
8. Departament de Biomedicina, Facultat de Medicina i Ciències de la Salut, Institut de Neurociències. Universitat de Barcelona, Barcelona, Catalonia, Spain.
9. Centro de Investigación Biomédica en Red sobre Enfermedades Neurodegenerativas (CIBERNED), Madrid, Spain.
10. Neurological Tissue Bank of the Biobanc-Hospital Clínic-Institut d'Investigacions Biomèdiques August Pi i Sunyer (IDIBAPS), Barcelona, Spain.
11. Alzheimer's disease and other cognitive disorders unit. Neurology Service, Hospital Clínic, Institut d'Investigacions Biomèdiques August Pi i Sunyer (IDIBAPS), University of Barcelona, Barcelona, Spain.
12. Molecular and Clinical Medicine, Ninewells Hospital and Medical School, University of Dundee, DD1 9SY, UK.

Corresponding author\*: Esther Sammler, [e.m.sammler@dundee.ac.uk](mailto:e.m.sammler@dundee.ac.uk), 0044 7545072451 (mobile), 0044 1382 223778 (fax)

**Supplementary Table 1.** List of materials and reagents. Antibodies (a), chemical reagents (b), synthetic peptides (c).

a

| Epitope and host                                         | Source or reference                       | Catalogue #                     | Comments          |
|----------------------------------------------------------|-------------------------------------------|---------------------------------|-------------------|
| anti-tubulin (mouse monoclonal)                          | Cell Signaling Technology                 | 3873                            | WB (1 µg/ml)      |
| anti-total LRRK2 N-terminal antibody (rabbit monoclonal) | MRC PPU Reagents and Services             | UDD3                            | WB (1 µg/ml)      |
| anti-phospho-S935-LRRK2 (rabbit monoclonal)              | MRC PPU Reagents and Services             | UDD2                            | WB (1 µg/ml)      |
| anti-C-terminal LRRK2 (mouse monoclonal)                 | Neuromab                                  | Clone number: N241A/34, #75-253 | WB (1 µg/ml)      |
| anti antibody phospho-Rab10 (Thr73) (rabbit monoclonal)  | Abcam                                     | MJF-21-108-10 (ab230261)        | WB (1 µg/ml)      |
| anti-total Rab10 (mouse monoclonal)                      | Nanotools                                 | 0680-100/Rab10-605B11           | WB (0.5 µg/ml)    |
| anti-GAPDH (mouse monoclonal)                            | Santa Cruz                                | sc-32233                        | 1:10,000 dilution |
| Goat anti-mouse IRDye 680LT                              | LI-COR                                    | 926-68020                       | 1:10,000 dilution |
| Goat anti-mouse IRDye 800CW                              | LI-COR                                    | 926-32210                       | 1:10,000 dilution |
| Goat anti-rabbit IRDye 800CW                             | LI-COR                                    | 926-32211                       | 1:10,000 dilution |
| anti-phospho-Rab8 (Thr72) (rabbit monoclonal)            | ABCAM                                     | #ab230260                       | WB (1 µg/ml)      |
| anti-phospho AMPK (Thr172) (rabbit monoclonal)           | Cell Signaling Technology                 | #4188                           | WB (1 µg/ml)      |
| anti-total AMPK (mouse monoclonal)                       | Cell Signaling Technology                 | #2793                           | WB (1 µg/ml)      |
| anti-Rab7A (mouse monoclonal)                            | Sigma                                     | #R8779                          | WB (1 µg/ml)      |
| anti-total LRRK1 (sheep polyclonal)                      | MRC PPU Reagents and Services             | sheep number S405C, 2nd bleed   | WB (1 µg/ml)      |
| anti-phospho-Rab7A (Ser72) (rabbit polyclonal)           | The MJFF's research tools program / Abcam | tools@michaeljfox.org           | WB (1 µg/ml)      |
| anti-PPM1H (sheep polyclonal)                            | MRC PPU Reagents and Services             | DA018                           | WB (1 µg/ml)      |

WB=Western blot

b

| Chemical Name                                                                                     | Company                  | Catalogue number                       | Comment                                                                   |
|---------------------------------------------------------------------------------------------------|--------------------------|----------------------------------------|---------------------------------------------------------------------------|
| 15 cm Analytical column                                                                           | EvoSep                   | EV-1106                                |                                                                           |
| 18-gauge syringe needle                                                                           | Sigma Aldrich            | Z261351                                |                                                                           |
| 2 cm Trap column                                                                                  | Thermo Fisher Scientific | 164562                                 |                                                                           |
| 50 cm Easy Spray column                                                                           | Thermo Fisher Scientific | ES803                                  |                                                                           |
| 8 cm analytical column                                                                            | EvoSep                   | EV-1109                                |                                                                           |
| Acetonitrile                                                                                      | VWR                      | 20048.32                               |                                                                           |
| Bovine serum albumin                                                                              | Sigma Aldrich            | 5470                                   |                                                                           |
| C18 celan up tips                                                                                 | Starstedt                | 70.760.501                             |                                                                           |
| C18 Sep-Pak cartridges                                                                            | Waters                   | WAT051910                              |                                                                           |
| CBQCA                                                                                             | Invitrogene              | C6667                                  |                                                                           |
| cis-2,6-dimethyl-4-(6-(5-(1-methylcyclopropoxy)-1H-indazol-3-yl)pyrimidin-4-yl)morpholine (MLi-2) |                          | Synthesized in-house by Natalia Shpiro |                                                                           |
| Diisopropylfluorophosphate (DIFP)                                                                 | Sigma Aldrich            | D0879                                  |                                                                           |
| Direct Human Neutrophil Isolation Kit                                                             | Stemcell                 | 19666                                  |                                                                           |
| EasySep Magnet                                                                                    | Stemcell                 | 18002                                  |                                                                           |
| Empore C18 disks                                                                                  | CDS-Analytical           | 2215                                   | <a href="https://www.cdsanalytical.com">https://www.cdsanalytical.com</a> |
| EvoTips                                                                                           | EvoSep                   | EV2001                                 |                                                                           |
| EvoTips                                                                                           | EvoSep                   | EV2001                                 |                                                                           |
| ExpiFectamine™ 293 Transfection Kit                                                               | Thermo Fisher Scientific | A14525                                 |                                                                           |
| Formic acid                                                                                       | Sigma Aldrich            | 695076                                 |                                                                           |
| Iodoacetamide                                                                                     | Sigma Aldrich            | I1149                                  |                                                                           |
| KCN                                                                                               | Sigma Aldrich            | 60178                                  |                                                                           |
| Methanol                                                                                          | VWR                      | 1.06035.2500                           |                                                                           |
| Microcystin-LR                                                                                    | Enzo                     | ALX-350-012-M001                       |                                                                           |
| MOPS                                                                                              | Sigma Aldrich            | 69947                                  |                                                                           |
| Phosphate buffered saline                                                                         | Gibco                    | <a href="#">10010023</a>               |                                                                           |
| PRTC-Mix                                                                                          | Pierce, Thermo           | 88320                                  |                                                                           |
| S-Trap mini columns                                                                               | Protifi                  | S-Trap mini CO2-mini-80                | <a href="https://www.protifi.com/">https://www.protifi.com/</a>           |
| Sodium Fluoride                                                                                   | Sigma Aldrich            | S7920                                  |                                                                           |
| Sodium orthovanadate                                                                              | Sigma Aldrich            | S6508                                  |                                                                           |
| Sodium phosphate dibasic                                                                          | Sigma Aldrich            | S9763                                  |                                                                           |
| Sodium pyrophosphate                                                                              | Sigma Aldrich            | P8010                                  |                                                                           |
| TPCK treated trypsin                                                                              | Sigma Aldrich            | T1426-100MG                            |                                                                           |
| Triethyl ammonium bicarbonate buffer                                                              | Sigma Aldrich            | T7408                                  |                                                                           |
| Trifluoroacetic acid                                                                              | Sigma Aldrich            | 302031                                 |                                                                           |
| Tris(2-carboxyethyl)phosphine hydrochloride (TCEP)                                                | Sigma Aldrich            | C4706                                  |                                                                           |
| Urea Sequenal grade                                                                               | Thermo Fisher Scientific | 29700                                  |                                                                           |
| β-Glycerophosphate disodium salt hydrate                                                          | Sigma Aldrich            | G5422                                  |                                                                           |
| Trypsin                                                                                           | Promega                  | V511A                                  |                                                                           |
| cOmplete(EDTA-free) protease inhibitor cocktail                                                   | Roche                    | 11836170001                            |                                                                           |
| EasySep Direct Human Neutrophil Isolation Kit                                                     | Stemcell                 | 19666                                  |                                                                           |

c

| Gene name | Phosphopeptide ( * denotes heavy amino acid) | PTM modification           | Species     | Phosphosite position (Mouse) | Phosphosite position (Human) | Heavy/Light label | Charge | MH+       | m/z (z=2) |
|-----------|----------------------------------------------|----------------------------|-------------|------------------------------|------------------------------|-------------------|--------|-----------|-----------|
| RAB10     | FHT(Phospho)ITTSYYR*                         | Thr3(Phospho)              | Mouse/Human | Thr73                        | Thr73                        | R* (13C(6)15N(4)) | 2      | 1378.6067 | 689.807   |
| RAB10     | FHT(Phospho)ITTSYYR                          | Thr3(Phospho)              | Mouse/Human | Thr73                        | Thr73                        | Light             | 2      | 1368.5984 | 684.8028  |
| RAB12     | FNS(Phospho)ITSAYYR*                         | Ser3(Phospho)              | Mouse/Human | Ser105                       | Ser106                       | R* (13C(6)15N(4)) | 2      | 1311.5645 | 656.2859  |
| RAB29     | FT(Phospho)S(Phospho)M(Oxidation)TR*         | Thr2(Phospho)Ser3(Phospho) | Mouse/Human | Thr71/Ser72                  | Thr71/Ser72                  | R* (13C(6)15N(4)) | 2      | 928.2911  | 464.6492  |
| RAB29     | FT(Phospho)SM(Oxidation)TR*                  | Thr2(Phospho)              | Mouse/Human | Thr71                        | Thr71                        | R* (13C(6)15N(4)) | 2      | 848.3247  | 424.666   |
| RAB29     | FTS(Phospho)M(Oxidation)TR*                  | Ser3(Phospho)              | Mouse/Human | Ser72                        | Ser72                        | R* (13C(6)15N(4)) | 2      | 848.3247  | 424.666   |
| RAB35     | FRT(Phospho)ITSTYYR*                         | Thr3(Phospho)              | Mouse/Human | Thr72                        | Thr72                        | R* (13C(6)15N(4)) | 2      | 1397.6489 | 699.3281  |
| RAB43     | FRT(Phospho)ITQSYR*                          | Thr3(Phospho)              | Mouse/Human | Thr80                        | Thr82                        | R* (13C(6)15N(4)) | 2      | 1424.6598 | 712.8335  |
| LRRK2     | SNS(Phospho)ISVGEVYR*                        | Ser3(Phospho)              | Mouse       | Ser910                       | Ser910                       | R* (13C(6)15N(4)) | 2      | 1300.5808 | 650.7941  |
| LRRK2     | SNS(Phospho)ISVGEFYR*                        | Ser3(Phospho)              | Human       | Ser910                       | Ser910                       | R* (13C(6)15N(4)) | 3      | 1907.8994 | 636.638   |
| LRRK2     | HSNS(Phospho)LGPVFDHEDLLR*                   | Ser4(Phospho)              | Mouse       | Ser935                       | Ser935                       | K* (13C(6)15N(2)) | 2      | 1925.8781 | 642.6309  |
| LRRK2     | HSNS(Phospho)LGPVFDHEDLLK*                   | Ser4(Phospho)              | Human       | Ser935                       | Ser935                       | R* (13C(6)15N(4)) | 2      | 1348.5808 | 674.7941  |
| LRRK2     | IGDEDGQFP AHR*                               |                            | Mouse       |                              |                              | R* (13C(6)15N(4)) | 2      | 1351.6265 | 676.3169  |
| LRRK2     | IGDEDGHFP AHR*                               |                            | Human       |                              |                              | R* (13C(6)15N(4)) | 3      | 1360.6268 | 454.2138  |
| RAB1A     | FADDTYTESYISTIGVDFK*                         |                            | Mouse/Human |                              |                              | K* (13C(6)15N(2)) | 3      | 3092.5012 | 1090.5117 |
| RAB3D     | DAADQNFDYMFK*                                |                            | Mouse/Human |                              |                              | K* (13C(6)15N(2)) | 2      | 1472.6242 | 736.8157  |
| RAB8A     | NIEEHASADVEK*                                |                            | Mouse/Human |                              |                              | K* (13C(6)15N(2)) | 2      | 1349.6423 | 675.3248  |
| RAB8B     | NIEEHASSDVER*                                |                            | Mouse/Human |                              |                              | R* (13C(6)15N(4)) | 2      | 1395.6374 | 698.3224  |
| RAB10     | NIDEHANEDVER*                                |                            | Mouse/Human |                              |                              | R* (13C(6)15N(4)) | 2      | 1450.6432 | 484.2193  |
| RAB10     | FHTITTSYYR*                                  |                            | Mouse/Human |                              |                              | R* (13C(6)15N(4)) | 2      | 1298.6403 | 433.5516  |
| RAB10     | AFLTLAEDILR*                                 |                            | Mouse/Human |                              |                              | R* (13C(6)15N(4)) | 2      | 1271.7233 | 636.3653  |
| RAB12     | DNFNVDEIFLK*                                 |                            | Mouse/Human |                              |                              | K* (13C(6)15N(2)) | 2      | 1361.6827 | 681.345   |
| RAB35     | DYDHLFK*                                     |                            | Mouse/Human |                              |                              | K* (13C(6)15N(2)) | 2      | 945.4556  | 473.2314  |
| RAB43     | YAGSNIVQLLIGNK*                              |                            | Mouse/Human |                              |                              | K* (13C(6)15N(2)) | 2      | 1497.8515 | 749.4294  |

**Supplementary Table 2. Detailed demographic and clinical characteristics of blood neutrophil donors.**

| STUDY ID | Group<br>1=L2_PD<br>2=L2_NMC<br>3=iPD<br>4=C | Mutation<br>1=G2019S<br>2=R1441G | Gender<br>1=Male<br>2=Female | AGE | Disease duration | Age at PD diagnosis | LEDD (mg) | UPDRS III on | UPDRS IV | Site<br>1 Barcelona<br>2 San Sebastian |
|----------|----------------------------------------------|----------------------------------|------------------------------|-----|------------------|---------------------|-----------|--------------|----------|----------------------------------------|
| 1        | 1                                            | 1                                | 2                            | 60  | 17               | 43                  | 1123      | 14           | 4        | 1                                      |
| 2        | 2                                            | 1                                | 2                            | 37  | NA               | NA                  | 0         | 0            | 0        | 1                                      |
| 3        | 2                                            | 1                                | 1                            | 69  | NA               | NA                  | 0         | 6            | 0        | 1                                      |
| 4        | 2                                            | 1                                | 1                            | 53  | NA               | NA                  | 0         | 3            | 0        | 1                                      |
| 5        | 4                                            | NA                               | 2                            | 60  | NA               | NA                  | NA        | NA           | NA       | 1                                      |
| 6        | 1                                            | 2                                | 1                            | 71  | 1                | 70                  | 405       | 25           | 0        | 1                                      |
| 7        | 4                                            | NA                               | 2                            | 67  | NA               | NA                  | NA        | NA           | NA       | 1                                      |
| 8        | 2                                            | 2                                | 2                            | 63  | NA               | NA                  | 0         | 2            | 0        | 1                                      |
| 9        | 2                                            | 2                                | 1                            | 60  | NA               | NA                  | 0         | 0            | 0        | 1                                      |
| 10       | 1                                            | 1                                | 1                            | 77  | 3                | 73                  | 750       | 17           | 0        | 1                                      |
| 11       | 2                                            | 1                                | 2                            | 48  | NA               | NA                  | 0         | 0            | 0        | 1                                      |
| 12       | 4                                            | NA                               | 1                            | 50  | NA               | NA                  | NA        | NA           | NA       | 1                                      |
| 13       | 1                                            | 1                                | 2                            | 71  | 2                | 68                  | 100       | 11           | 0        | 1                                      |
| 14       | 4                                            | NA                               | 2                            | 79  | NA               | NA                  | NA        | NA           | NA       | 1                                      |
| 15       | 3                                            | NA                               | 1                            | 80  | 4                | 75                  | 550       | 26           | 1        | 1                                      |
| 16       | 1                                            | 1                                | 2                            | 47  | 3                | 43                  | 705       | 7            | 1        | 1                                      |
| 17       | 3                                            | NA                               | 1                            | 79  | 2                | 77                  | 0         | 13           | 0        | 1                                      |
| 18       | 3                                            | NA                               | 1                            | 68  | 3                | 64                  | 820       | 12           | 0        | 1                                      |
| 19       | 3                                            | NA                               | 2                            | 56  | 1                | 55                  | 315       | 18           | 0        | 1                                      |
| 20       | 3                                            | NA                               | 2                            | 68  | 12               | 55                  | 1010      | 28           | 5        | 1                                      |
| 21       | 4                                            | NA                               | 2                            | 40  | NA               | NA                  | NA        | NA           | NA       | 1                                      |
| 22       | 2                                            | 1                                | 1                            | 42  | NA               | NA                  | 0         | 0            | 0        | 1                                      |
| 23       | 4                                            | NA                               | 2                            | 68  | NA               | NA                  | NA        | NA           | NA       | 1                                      |
| 24       | 3                                            | NA                               | 1                            | 69  | 8                | 60                  | 700       | 26           | 2        | 1                                      |
| 25       | 3                                            | NA                               | 2                            | 74  | 11               | 63                  | 1055      | 13           | 7        | 1                                      |
| 26       | 3                                            | NA                               | 1                            | 78  | 0                | 78                  | 450       | 11           | 0        | 1                                      |
| 27       | 2                                            | 1                                | 2                            | 63  | NA               | NA                  | 0         | 0            | 0        | 1                                      |
| 28       | 1                                            | 1                                | 2                            | 55  | 1                | 54                  | 100       | 11           | 0        | 1                                      |
| 29       | 4                                            | NA                               | 1                            | 57  | NA               | NA                  | NA        | NA           | NA       | 1                                      |
| 30       | 3                                            | NA                               | 2                            | 55  | 5                | 49                  | 950       | 12           | 10       | 1                                      |
| 31       | 3                                            | NA                               | 1                            | 74  | 11               | 62                  | 838       | 29           | 0        | 1                                      |
| 32       | 4                                            | NA                               | 2                            | 70  | NA               | NA                  | NA        | NA           | NA       | 1                                      |
| 33       | 3                                            | NA                               | 2                            | 68  | 2                | 65                  | 300       | 21           | 0        | 1                                      |
| 34       | 4                                            | NA                               | 1                            | 71  | NA               | NA                  | NA        | NA           | NA       | 1                                      |
| 35       | 3                                            | NA                               | 2                            | 66  | 17               | 48                  | 510       | 9            | 1        | 1                                      |
| 36       | 4                                            | NA                               | 1                            | 50  | NA               | NA                  | NA        | NA           | NA       | 1                                      |
| 37       | 4                                            | NA                               | 2                            | 82  | NA               | NA                  | NA        | NA           | NA       | 1                                      |
| 38       | 4                                            | NA                               | 2                            | 73  | NA               | NA                  | NA        | NA           | NA       | 1                                      |
| 39       | 2                                            | 1                                | 1                            | 51  | NA               | NA                  | 0         | 0            | 0        | 1                                      |
| 40       | 1                                            | 1                                | 1                            | 53  | 20               | 33                  | 1131      | 25           | 8        | 1                                      |
| 41       | 4                                            | NA                               | 2                            | 53  | NA               | NA                  | NA        | NA           | NA       | 1                                      |
| 42       | 3                                            | NA                               | 1                            | 79  | 3                | 75                  | 400       | 16           | 0        | 1                                      |
| 43       | 1                                            | 1                                | 1                            | 80  | 16               | 63                  | 400       | 29           | 7        | 1                                      |
| 44       | 1                                            | 1                                | 2                            | 72  | 10               | 61                  | 955       | 10           | 5        | 1                                      |
| 45       | 1                                            | 1                                | 2                            | 52  | 8                | 43                  | 220       | 13           | 5        | 1                                      |
| 46       | 2                                            | 1                                | 2                            | 48  | NA               | NA                  | 0         | 0            | 0        | 1                                      |
| 47       | 3                                            | NA                               | 1                            | 76  | 3                | 72                  | 250       | 10           | 0        | 1                                      |
| 48       | 4                                            | NA                               | 2                            | 73  | NA               | NA                  | NA        | NA           | NA       | 1                                      |
| 49       | 2                                            | 1                                | 1                            | 45  | NA               | NA                  | 0         | 0            | 0        | 1                                      |
| 50       | 4                                            | NA                               | 1                            | 66  | NA               | NA                  | NA        | NA           | NA       | 1                                      |
| 51       | 3                                            | NA                               | 2                            | 76  | 2                | 73                  | 840       | 21           | 0        | 1                                      |
| 52       | 1                                            | 1                                | 1                            | 66  | 19               | 46                  | 400       | 24           | 11       | 1                                      |
| 53       | 4                                            | NA                               | 2                            | 64  | NA               | NA                  | NA        | NA           | NA       | 1                                      |
| 54       | 1                                            | 1                                | 2                            | 83  | 2                | 81                  | 1164      | 37           | 9        | 1                                      |
| 55       | 4                                            | NA                               | 2                            | 59  | NA               | NA                  | NA        | NA           | NA       | 1                                      |
| 56       | 4                                            | NA                               | 1                            | 64  | NA               | NA                  | NA        | NA           | NA       | 1                                      |
| 57       | 3                                            | NA                               | 2                            | 64  | 14               | 49                  | 550       | 34           | 11       | 1                                      |
| 58       | 3                                            | NA                               | 2                            | 78  | 14               | 63                  | 750       | 23           | 3        | 1                                      |
| 59       | 3                                            | NA                               | 1                            | 51  | 4                | 46                  | 205       | 14           | 0        | 1                                      |
| 60       | 2                                            | 2                                | 1                            | 62  | NA               | NA                  | 0         | 0            | 0        | 1                                      |
| 61       | 4                                            | NA                               | 1                            | 58  | NA               | NA                  | NA        | NA           | NA       | 1                                      |
| 62       | 1                                            | 1                                | 2                            | 57  | 4                | 52                  | 499       | 10           | 3        | 1                                      |
| 63       | 1                                            | 2                                | 1                            | 66  | 7                | 58                  | 600       | 20           | 0        | 1                                      |
| 64       | 4                                            | NA                               | 2                            | 65  | NA               | NA                  | NA        | NA           | NA       | 1                                      |
| 65       | 3                                            | NA                               | 1                            | 60  | 7                | 52                  | 1100      | 31           | 1        | 1                                      |
| 66       | 4                                            | NA                               | 2                            | 53  | NA               | NA                  | NA        | NA           | NA       | 1                                      |
| 67       | 2                                            | 2                                | 1                            | 63  | NA               | NA                  | 0         | 0            | 0        | 2                                      |
| 68       | 1                                            | 2                                | 2                            | 74  | 11               | 63                  | 310       | 14           | 0        | 2                                      |
| 69       | 1                                            | 2                                | 1                            | 62  | 5                | 57                  | 300       | 0            | 0        | 2                                      |
| 70       | 2                                            | 2                                | 2                            | 60  | NA               | NA                  | 0         | 0            | 0        | 2                                      |
| 71       | 1                                            | 2                                | 2                            | 75  | 9                | 66                  | 400       | 4            | 9        | 2                                      |
| 72       | 4                                            | NA                               | 2                            | 45  | NA               | NA                  | NA        | NA           | NA       | 2                                      |
| 73       | 1                                            | 2                                | 2                            | 86  | 7                | 78                  | 550       | 30           | 0        | 2                                      |
| 74       | 3                                            | NA                               | 1                            | 56  | 20               | 37                  | 400       | missing      | missing  | 2                                      |
| 75       | 3                                            | NA                               | 1                            | 75  | 10               | 65                  | 900       | 13           | 6        | 2                                      |
| 76       | 3                                            | NA                               | 1                            | 65  | 13               | 52                  | 1865      | 9            | 0        | 2                                      |
| 77       | 3                                            | NA                               | 1                            | 74  | 10               | 64                  | 1617      | 50           | 0        | 2                                      |
| 78       | 4                                            | NA                               | 2                            | 73  | NA               | NA                  | NA        | NA           | NA       | 2                                      |
| 79       | 1                                            | 2                                | 2                            | 59  | 3                | 56                  | 500       | 17           | 0        | 2                                      |
| 80       | 4                                            | NA                               | 2                            | 46  | NA               | NA                  | NA        | NA           | NA       | 2                                      |
| 81       | 2                                            | 2                                | 2                            | 49  | NA               | NA                  | 0         | 0            | 0        | 2                                      |
| 82       | 4                                            | NA                               | 2                            | 49  | NA               | NA                  | NA        | NA           | NA       | 2                                      |
| 83       | 4                                            | NA                               | 2                            | 55  | NA               | NA                  | NA        | NA           | NA       | 2                                      |
| 84       | 4                                            | NA                               | 2                            | 56  | NA               | NA                  | NA        | NA           | NA       | 2                                      |
| 85       | 3                                            | NA                               | 2                            | 61  | 4                | 57                  | 550       | 8            | 0        | 2                                      |
| 86       | 4                                            | NA                               | 1                            | 52  | NA               | NA                  | NA        | NA           | NA       | 2                                      |
| 87       | 4                                            | NA                               | 2                            | 43  | NA               | NA                  | NA        | NA           | NA       | 2                                      |
| 88       | 4                                            | NA                               | 2                            | 64  | NA               | NA                  | NA        | NA           | NA       | 2                                      |
| 89       | 3                                            | NA                               | 1                            | 68  | 5                | 63                  | 550       | 23           | 0        | 2                                      |
| 90       | 1                                            | 2                                | 1                            | 78  | 8                | 70                  | 633       | 34           | 0        | 2                                      |
| 91       | 1                                            | 2                                | 1                            | 63  | 17               | 46                  | 1485      | 42           | 0        | 2                                      |
| 92       | 3                                            | NA                               | 2                            | 53  | 7                | 46                  | 825       | 4            | 1        | 2                                      |
| 93       | 4                                            | NA                               | 2                            | 48  | NA               | NA                  | NA        | NA           | NA       | 2                                      |
| 94       | 1                                            | 2                                | 2                            | 45  | 3                | 42                  | 495       | 8            | 0        | 2                                      |
| 95       | 1                                            | 2                                | 1                            | 74  | 18               | 56                  | 1566      | 43           | 8        | 2                                      |
| 96       | 1                                            | 2                                | 2                            | 76  | 7                | 69                  | 580       | 7            | 0        | 2                                      |
| 97       | 1                                            | 2                                | 1                            | 61  | 17               | 44                  | 974       | 47           | 4        | 2                                      |
| 98       | 2                                            | 2                                | 2                            | 54  | NA               | NA                  | 0         | 2            | 0        | 2                                      |
| 99       | 4                                            | NA                               | 1                            | 70  | NA               | NA                  | NA        | NA           | NA       | 2                                      |
| 100      | 2                                            | 2                                | 2                            | 55  | NA               | NA                  | 0         | 1            | 0        | 2                                      |
| 101      | 3                                            | NA                               | 1                            | 61  | 3                | 48                  | 1617      | 34           | 12       | 2                                      |

**Supplementary Table 2. Detailed demographic and clinical characteristics of peripheral blood neutrophil donors.** Including group (LRRK2-PD, LRRK2-non-manifesting carrier (NMC), idiopathic PD and control), study and original site ID, specific mutation that participant carriers, age range, disease duration, age at PD diagnosis, *LEDD* is L-dopa equivalent daily dosage, *UPDRS* is Unified Parkinson's Disease Rating Scale[12], part III (motor symptoms) and part IV (motor complications), participant's location site (either Barcelona or San Sebastian). L2\_PD = LRRK2-associated Parkinson's disease; L2\_NMC = LRRK2 non-manifesting mutation carrier; iPD = idiopathic PD.

## Supplementary figure 1. Dose response of the LRRK2 kinase inhibitor MLI-2 in human peripheral blood neutrophils

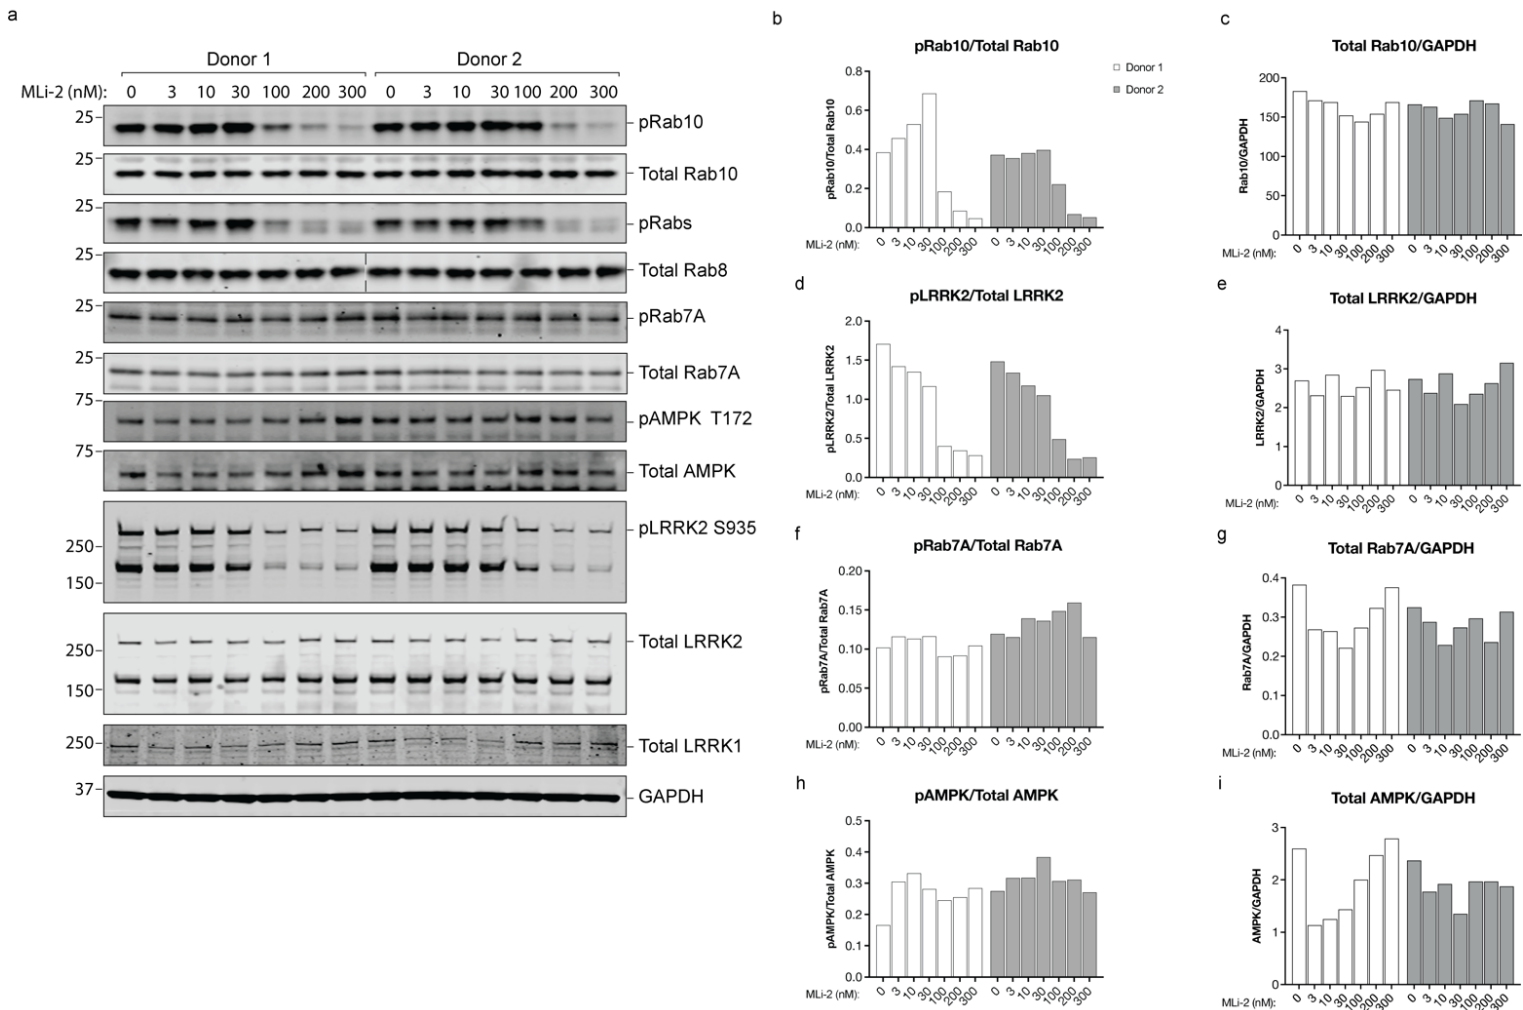

**Supplementary figure 1. Dose response of the LRRK2 kinase inhibitor MLI-2 in human peripheral blood neutrophils.** (a) Neutrophils were isolated from two healthy donors and treated with the concentrations between 0 and 300nM of MLI-2 as indicated for 30 min. Cells were then lysed and either 10  $\mu$ g or 20 $\mu$ g (for LRRK1, total and phosphorylated Rab7A) of whole cell extract subjected to quantitative immunoblot analysis with the indicated antibodies and the membranes were developed using the Odyssey CLx scan Western Blot imaging system. (b-i) Quantitation of immunoblots for phospho-Thr73 Rab10/total Rab10 and phospho-Serine 935/total LRRK2 (full length) clearly show significant dephosphorylation of the respective LRRK2 kinase dependent phosphoepitopes at MLI2 concentrations of 30nM up to 300nM (b, d) while total levels of Rab10 and total LRRK2 (full length) don't significantly change (c, e). In contrast, levels of the LRRK1 dependent Rab7A and AMPK dependent AMPK phosphorylation at Threonine 172 remain largely unchanged (f, h). Total levels of Rab7A (g) and AMPK (i) are also shown.

**Supplementary figure 2. Representative Immunoblot analysis of peripheral blood neutrophil samples.**

**a**

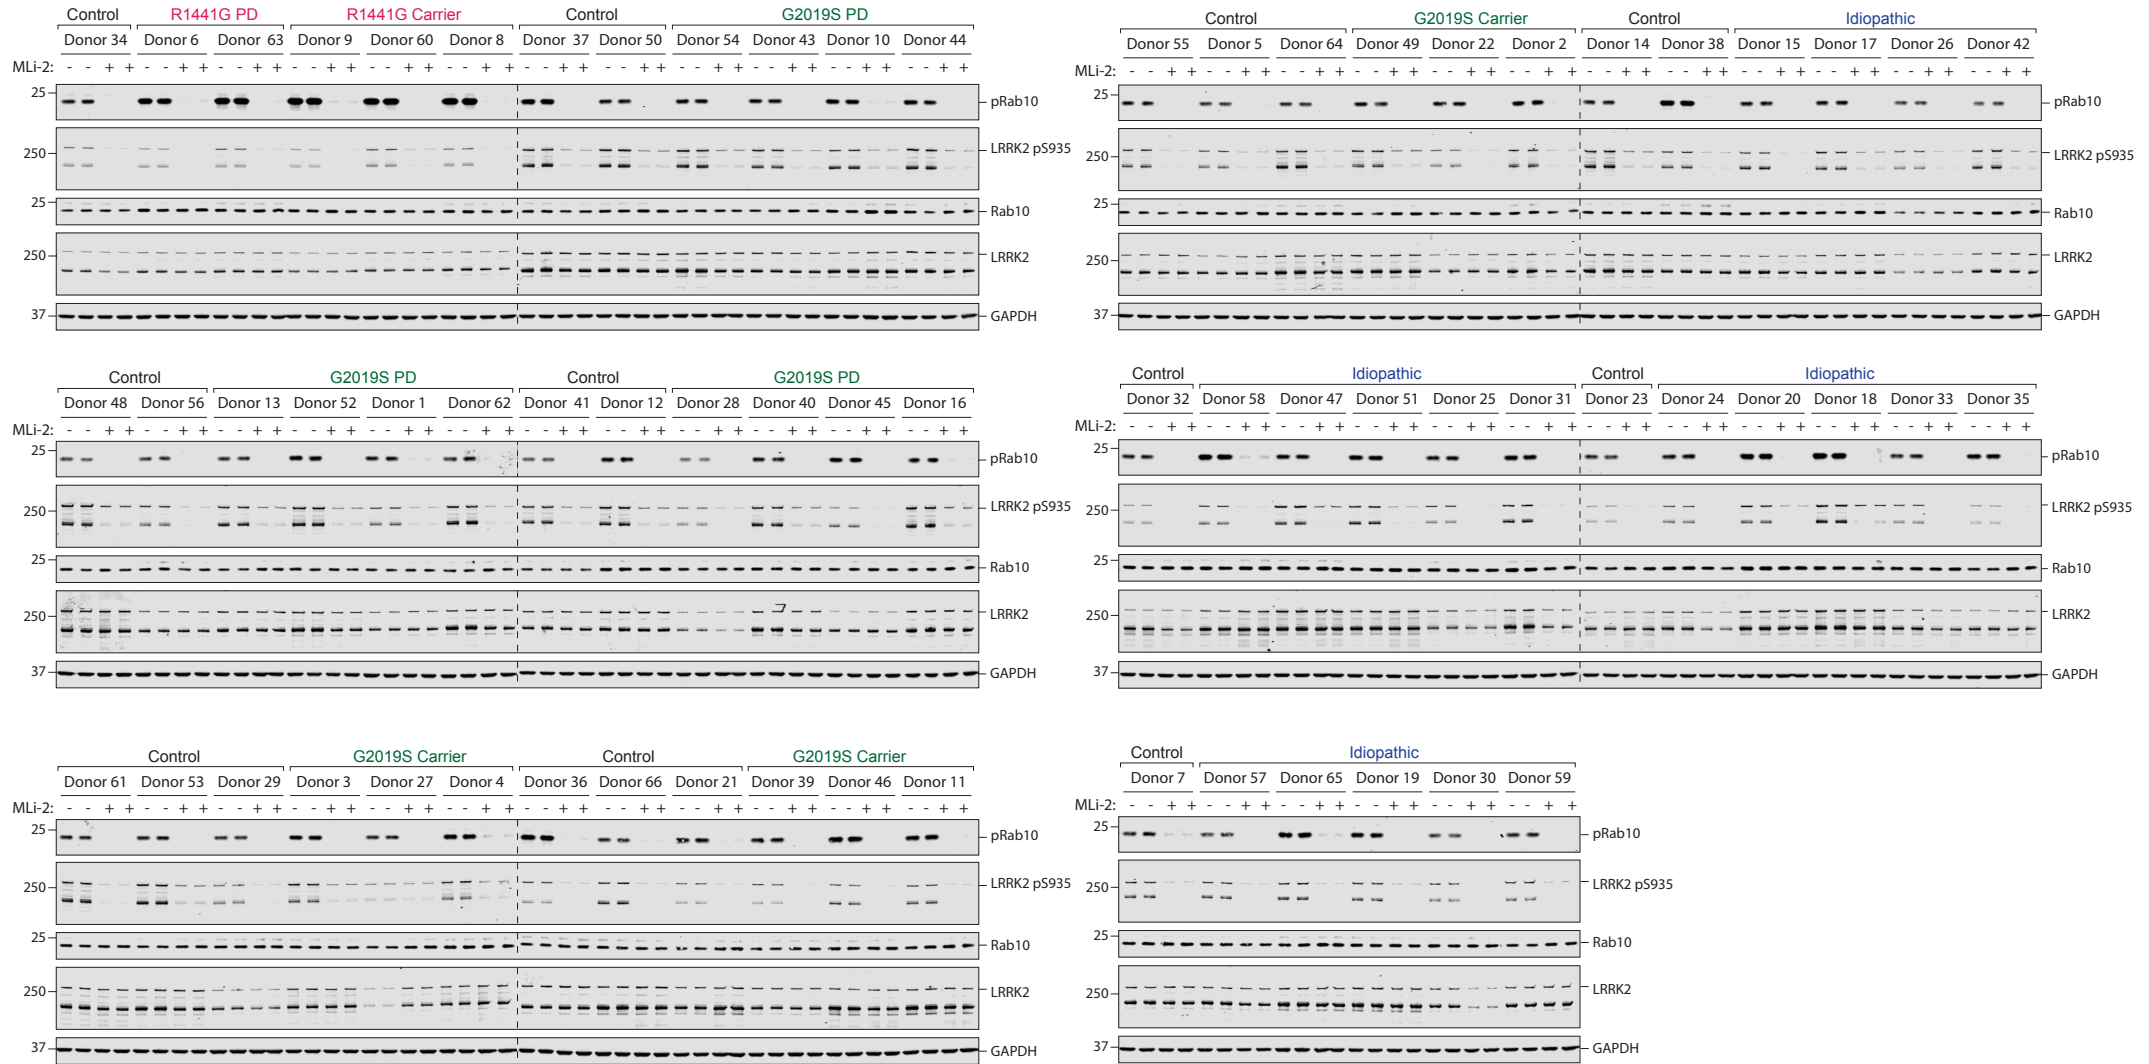



b

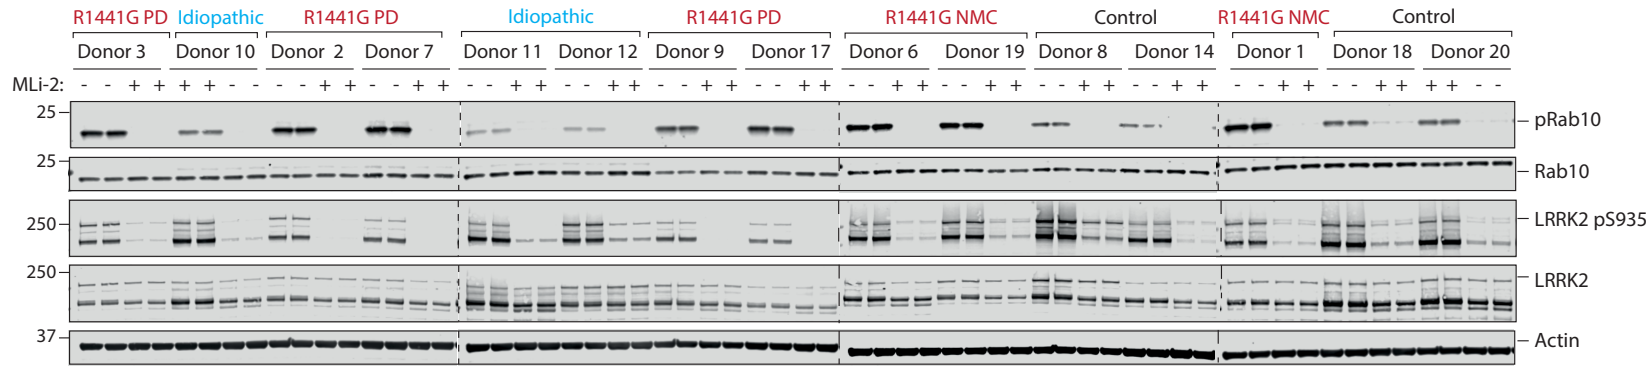

c

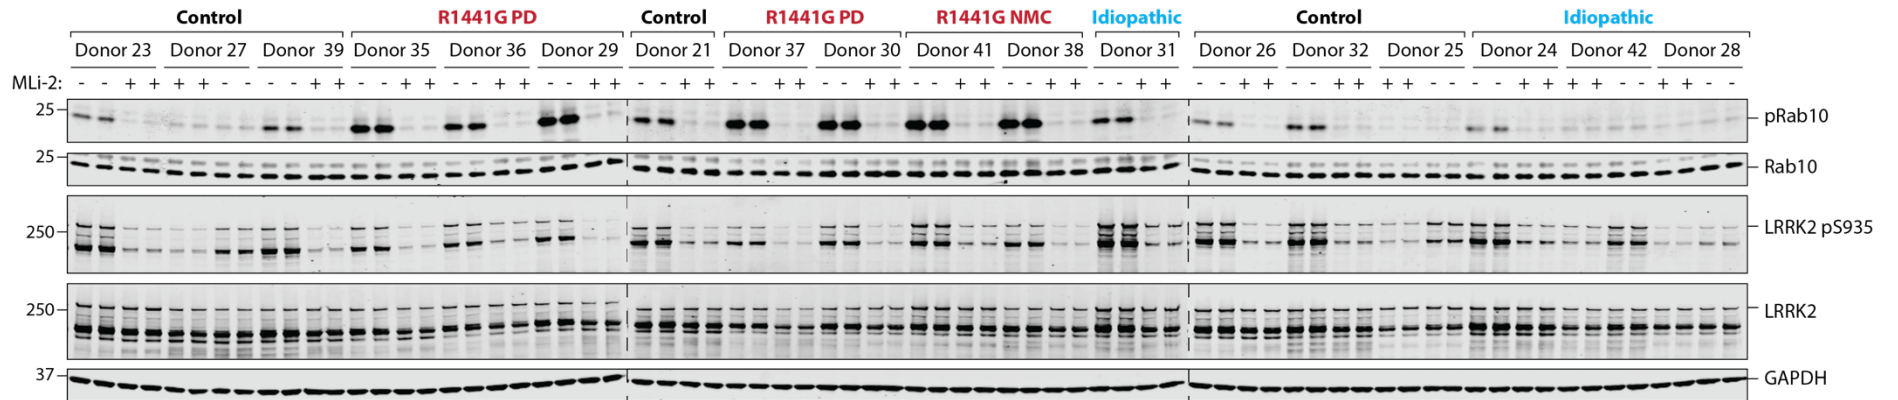

**Supplementary figure 2. Representative Immunoblot analysis of peripheral blood neutrophil samples.** Neutrophils isolated from fresh peripheral blood were treated with either DMSO vehicle control or the specific LRRK2 kinase inhibitor MLI-2 at a concentration of 200nM for 30 minutes prior to cell lysis. 10 µg of whole cell extracts were then loaded in duplicates and subjected to quantitative immunoblot analysis with the indicated antibodies and the membranes developed using the Odyssey CLx scan Western Blot imaging system. pRab10 and total Rab10 protein as well as Serine 935 and total LRRK2 antibodies were multiplexed and the same internal standard was run on every gel to compare samples run on different gels (not shown). Similar results were obtained in two independent immunoblot experiments of the same extracts. (a) Representative immunoblot for neutrophils derived from the 66 participants from Barcelona (ID 1-66). (b) Representative immunoblot for neutrophils derived from the 35 participants from San Sebastian (ID 67-101).

Supplementary figure 3. Impact of biological sex on LRRK2 dependent Rab10 phosphorylation.

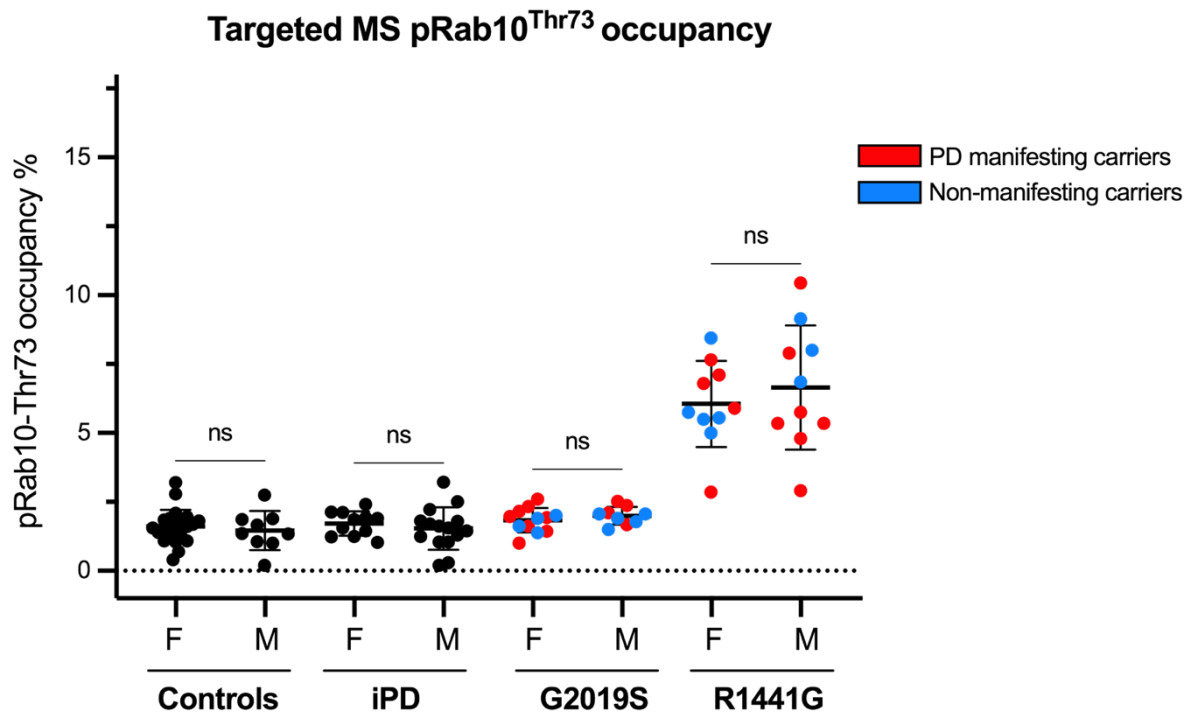

**Supplementary figure 3. Impact of biological sex on LRRK2 dependent Rab10 phosphorylation.** Quantification of Rab10-pThr73 stoichiometry (%) in DMSO treated neutrophil lysates segregated by gender for each group including controls, iPD and LRRK2 mutation carriers of either the G2019S or R1441G mutation. PD or non-manifesting carriers (NMC) status indicated by colour. One-way ANOVA with multiple comparisons was applied with the mean of females and males for each group being compared with each other. Rab10<sup>Thr73</sup> phosphorylation occupancy is presented as means  $\pm$  SD. There was no statistically significant difference between females and males in each group (ns=not significant).

**Supplementary table 3: Clinical and pathological characteristics of all brain donors.**

| Donor                     | Sample site (1=Columbia, 2=Barcelona) | Clinical diagnosis                                                     | Neuropathologic diagnosis                                | <i>LRKK2</i> Mutation status | Sex | Age at death | Cold PMI (hrs:min) | Region for IB analysis (1: Frontal, 2: Occipital) | Thal amyloid phase | NFT Braak stage | CERAD score | NIA "ABC" score | Burden of ADNC | Lewy body Braak stage | LATE-NC stage |
|---------------------------|---------------------------------------|------------------------------------------------------------------------|----------------------------------------------------------|------------------------------|-----|--------------|--------------------|---------------------------------------------------|--------------------|-----------------|-------------|-----------------|----------------|-----------------------|---------------|
| <b>CONTROL GROUP</b>      |                                       |                                                                        |                                                          |                              |     |              |                    |                                                   |                    |                 |             |                 |                |                       |               |
| Bar-14                    | 2                                     | Neurologic control                                                     | Low ADNC                                                 | n.a.                         | F   | 81           | 23:30              | 1                                                 | 5                  | I               | moderate    | A3B1C2          | Low            | 0                     | not available |
| Bar-15                    | 2                                     | Control (Brainstem hemorrhage)                                         | Intermediate ADNC + Brainstem hemorrhage                 | n.a.                         | F   | 90           | 12:20              | 1                                                 | 3                  | III             | moderate    | A2B2C2          | Intermediate   | 0                     | 0             |
| Bar-16                    | 2                                     | Neurologic control                                                     | PART + Lacunar infarcts                                  | n.a.                         | M   | 78           | 6:00               | 1                                                 | 1                  | I-II            | none        | A1B1C0          | Low            | 1                     | 0             |
| Bar-17                    | 2                                     | Neurologic control                                                     | Low ADNC + AGD stage II                                  | n.a.                         | F   | 88           | 23:59              | 1                                                 | 3                  | II              | moderate    | A2B1C2          | Low            | 0                     | 0             |
| Bar-18                    | 2                                     | Neurologic control (Metastatic melanoma)                               | High ADNC + Melanoma metastasis + Lacunar infarcts       | n.a.                         | F   | 77           | 4:30               | 1                                                 | 5                  | V               | moderate    | A3B3C2          | High           | 0                     | 0             |
| Bar-19                    | 2                                     | Neurologic control                                                     | PART + Lacunar infarcts                                  | n.a.                         | F   | 83           | 7:30               | 1                                                 | 0                  | II              | none        | A0B1C0          | Not            | 0                     | 0             |
| Bar-20                    | 2                                     | Neurologic control                                                     | Low ADNC + ARTAG + AGD stage II + LBD + Lacunar infarcts | n.a.                         | M   | 86           | 7:25               | 1                                                 | 3                  | II              | sparse      | A2B1C1          | Low            | 1                     | 0             |
| Col-7                     | 1                                     | Pneumonia, neurologic control                                          | PART                                                     | n.a.                         | M   | 87           | 3:12               | 1,2                                               | 0                  | III             | none        | A0B2C0          | Not            | 0                     | not available |
| Col-8                     | 1                                     | Past medical history of ischemic heart disease, neurologic control     | NDAR                                                     | n.a.                         | M   | 74           | 1:33               | 1,2                                               | 0                  | 0               | none        | A0B0C0          | Not            | 0                     | not available |
| Col-9                     | 1                                     | Congestive heart failure and chronic kidney disease, cognitive decline | Low ADNC                                                 | n.a.                         | M   | 94           | 07:58*             | 1,2                                               | 2                  | IV              | sparse      | A1B2C1          | Low            | 0                     | not available |
| <b>LRRK2-PD GROUP</b>     |                                       |                                                                        |                                                          |                              |     |              |                    |                                                   |                    |                 |             |                 |                |                       |               |
| Bar-1                     | 2                                     | PD                                                                     | PD                                                       | c.6055G>A, p.G2019S          | M   | 76           | 3:30               | 1                                                 | 0                  | I               | none        | A0B1C0          | Not            | 4                     | not available |
| Bar-2                     | 2                                     | PDD                                                                    | PDD                                                      | c.6055G>A, p.G2019S          | F   | 77           | 8:00               | 1                                                 | 0                  | III             | none        | A0B2C0          | Not            | 0                     | not available |
| Bar-3                     | 2                                     | PD                                                                     | PD + Intermediate ADNC                                   | c.6055G>A, p.G2019S          | F   | 92           | 7:00               | 1                                                 | 5                  | IV              | frequent    | A3B2C3          | Intermediate   | 4                     | 0             |
| Bar-4                     | 2                                     | PD                                                                     | PD + Low ADNC                                            | c.6055G>A, p.G2019S          | F   | 69           | 12:30              | 1                                                 | 4                  | II              | moderate    | A3B1C2          | Low            | 5                     | 0             |
| Bar-5                     | 2                                     | PD                                                                     | PD                                                       | c.4322G>A, p.R1441H          | M   | 69           | 15:30              | 1                                                 | 0                  | II              | none        | A0B1C0          | Not            | 0                     | 0             |
| Bar-6                     | 2                                     | PD                                                                     | PD + PSP + Intermediate ADNC                             | c.6055G>A, p.G2019S          | M   | 85           | 17:00              | 1                                                 | 4                  | III             | moderate    | A3B2C0          | Intermediate   | 0                     | 0             |
| Col-3                     | 1                                     | PD                                                                     | PD + PSP                                                 | c.6055G>A, p.G2019S          | M   | 89           | 2:05               | 1,2                                               | 0                  | NA              | none        | N/A             | Not            | 4                     | 0             |
| Col-5                     | 1                                     | PD                                                                     | PD + Intermediate ADNC                                   | c.6055G>A, p.G2019S          | M   | 79           | 07:40*             | 1,2                                               | 3                  | V               | moderate    | A2B3C2          | Intermediate   | 6                     | 1             |
| Col-6                     | 1                                     | PD                                                                     | PD + High ADNC                                           | c.6055G>A, p.G2019S          | M   | 89           | 12:09              | 1,2                                               | 4                  | V               | moderate    | A3B3C2          | High           | *                     | 1             |
| <b>NON-LRRK2 PD GROUP</b> |                                       |                                                                        |                                                          |                              |     |              |                    |                                                   |                    |                 |             |                 |                |                       |               |
| Bar-7                     | 2                                     | PD                                                                     | PD                                                       | wt                           | M   | 83           | 14:00              | 1                                                 | 0                  | II              | none        | A0B1C0          | Not            | 5                     | 0             |
| Bar-8                     | 2                                     | PD                                                                     | PD + Intermediate ADNC                                   | wt                           | M   | 88           | 16:30              | 1                                                 | 3                  | III             | sparse      | A2B2C1          | Intermediate   | 4                     | 0             |
| Bar-9                     | 2                                     | PD                                                                     | PD                                                       | wt                           | F   | 85           | 7:00               | 1                                                 | 0                  | IV              | none        | A0B2C0          | Not            | 5                     | 0             |
| Bar-10                    | 2                                     | PD                                                                     | PD + Low ADNC                                            | wt                           | M   | 83           | 7:30               | 1                                                 | 1                  | II              | sparse      | A1B1C1          | Low            | 5                     | 0             |
| Bar-11                    | 2                                     | PDD                                                                    | PD + Intermediate ADNC                                   | wt                           | F   | 82           | 4:06               | 1                                                 | 3                  | III             | frequent    | A2B2C3          | Intermediate   | 6                     | 0             |
| Bar-12                    | 2                                     | PD                                                                     | PD + Low ADNC                                            | wt                           | M   | 77           | 6:25               | 1                                                 | 1                  | III             | none        | A1B2C0          | Low            | 5                     | 0             |
| Bar-13                    | 2                                     | PD                                                                     | PD + Low ADNC                                            | wt                           | M   | 76           | 12:00              | 1                                                 | 4                  | II              | frequent    | A3B1C3          | Low            | 5                     | 0             |
| Col-1                     | 1                                     | PD                                                                     | PD + PART                                                | wt                           | F   | 88           | 4:00               | 1,2                                               | 0                  | IV              | none        | A0B2C0          | Not            | 4                     | 1             |
| Col-2                     | 1                                     | PD                                                                     | PD + Low ADNC                                            | wt                           | M   | 79           | 10:30*             | 1,2                                               | 3                  | II              | moderate    | A2B1C2          | Low            | 6                     | not available |
| Col-4                     | 1                                     | PD                                                                     | PD + Low ADNC                                            | wt                           | M   | 81           | 07:52*             | 1,2                                               | 1                  | IV              | sparse      | A1B2C1          | Low            | 4                     | 3             |

**Supplementary table 3: Clinical and pathological characteristics of all brain donors.** Demographic data for the postmortem brain samples that were used in this study are shown including the source of the sample (either Columbia University or University of Barcelona), pathologic group including *LRRK2*-associated PD, non-*LRRK2* PD, or control, clinical and neuropathologic diagnosis, *LRRK2* mutation status, sex, age at death, cold postmortem interval (PMI) and \* frozen PMI where cold PMI was not available, brain region used for immunoblotting, neuropathologic assessment including Thal amyloid phase [7], Braak stage of neurofibrillary changes of the Alzheimer type (neurofibrillary tangles (NFT)) [1], Consortium to Establish a Registry for Alzheimer's Disease (CERAD) score [4] and National Institute on Aging and Alzheimer's Association (NIA-AA) category [3, 5], Braak stage of Lewy body disease [2] as well as Limbic-predominant age-related TDP-43 encephalopathy neuropathologic changes (LATE-NC) score [6] where available. AD=Alzheimer's Disease, ADNC=Alzheimer's disease neuropathologic change, AGD=Argyrophilic grain disease, ARTAG=Aging-related tau astroglial pathology, LBD=Lewy body dementia, NDAR=No diagnostic abnormality recognized, PART=Primary age-related tauopathy, PDD=Parkinson's disease dementia, PSP=Progressive Supranuclear Palsy. \* One LB in the claustrum and one LB in cingulate cortex.

Supplementary figure 4: Representative Immunoblot analysis in human brain extracts.

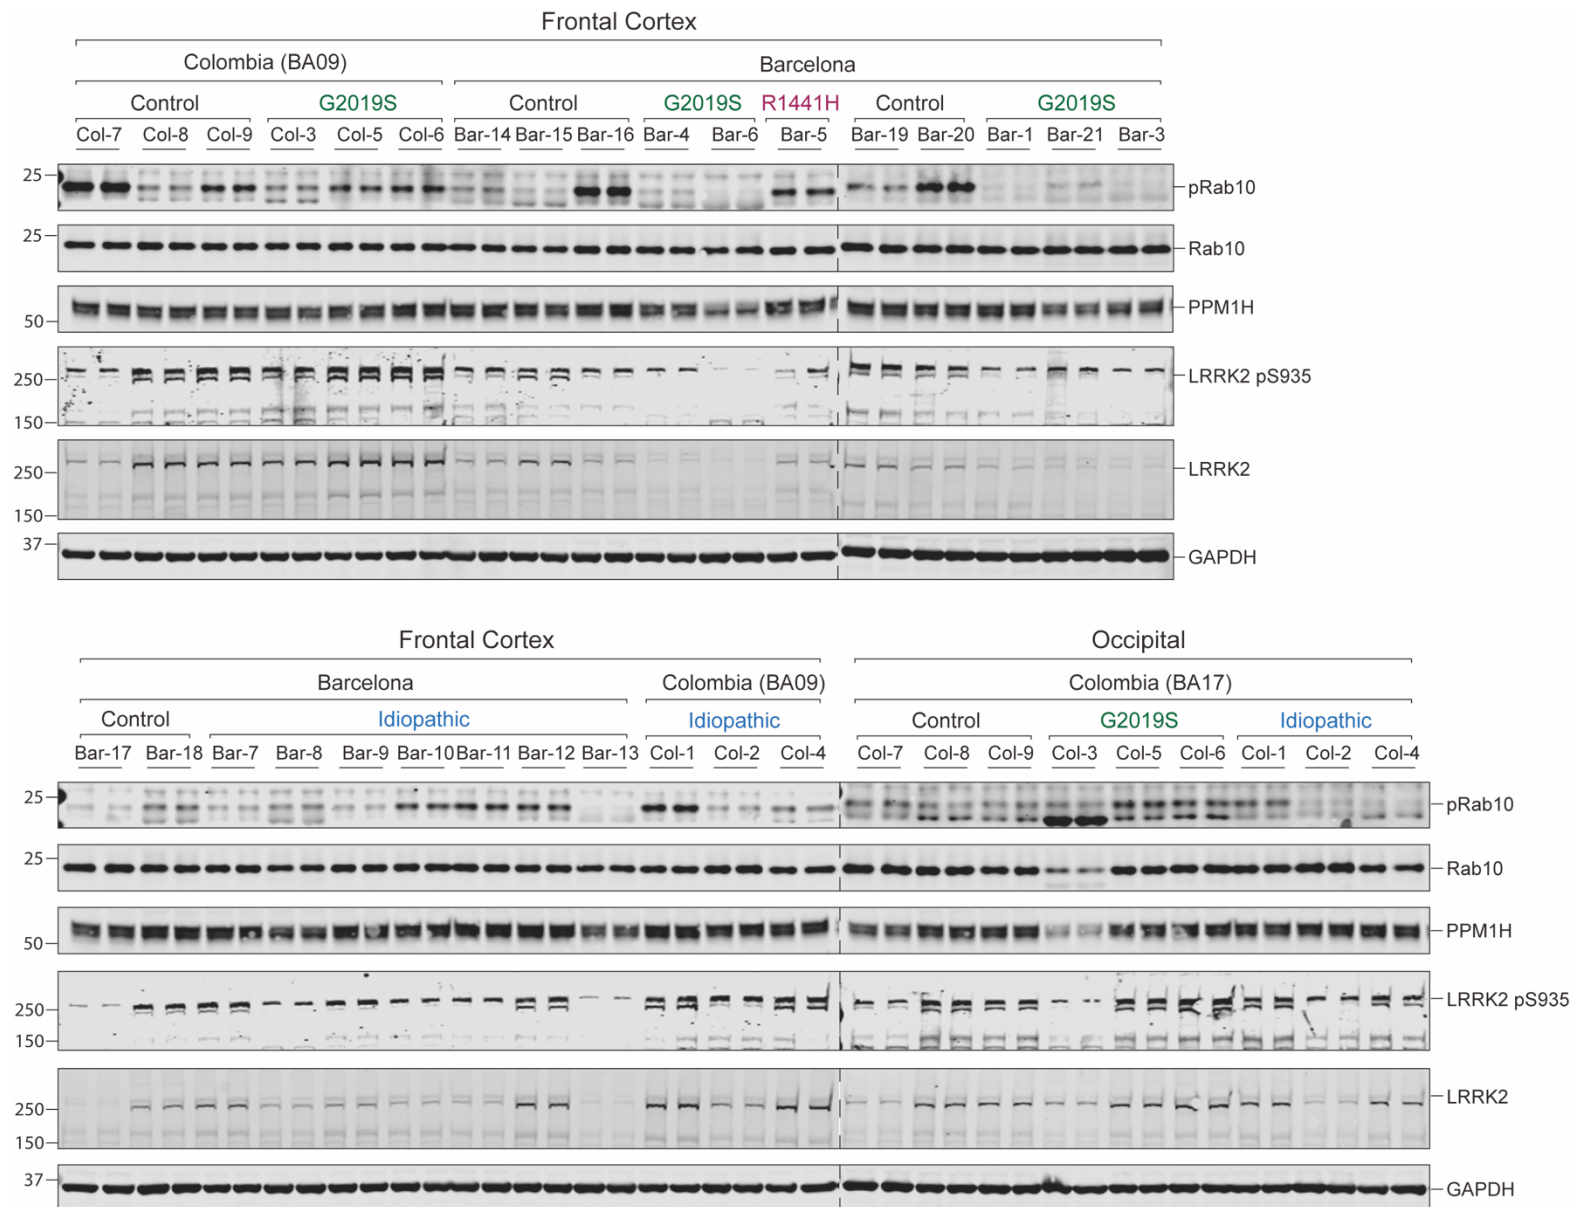

**Supplementary figure 4: Representative Immunoblot analysis in human brain extracts.** Snap frozen autopsy samples were obtained from matched frontal and occipital cortex samples of 10 individuals including 3 controls, 4 G2019S mutation carriers with PD and 3 iPD from the brain bank at the Columbia University Medical Center in New York, USA and additionally 20 frontal cortex samples from 7 controls, 7 iPD, 5 G2019S and 1 R1441H mutation carriers with PD from the IDIBAPS Biobank at the Hospital Clinic in Barcelona, Spain. Whole tissue lysates from each of these were generated and duplicate loading of 20 µg subjected to immunoblot analysis using the indicated antibodies. pRab10 and total Rab10 protein as well as Serine 935 and total LRRK2 antibodies were multiplexed and the same internal standard was run on every gel to compare samples run on different gels (not shown). Shown here is one of two independent immunoblot experiments used for quantification.

### References

- Braak H, Alafuzoff I, Arzberger T, Kretschmar H, Del Tredici K (2006) Staging of Alzheimer disease-associated neurofibrillary pathology using paraffin sections and immunocytochemistry. *Acta Neuropathol* 112: 389-404 Doi 10.1007/s00401-006-0127-z
- Braak H, Del Tredici K, Rub U, de Vos RA, Jansen Steur EN, Braak E (2003) Staging of brain pathology related to sporadic Parkinson's disease. *Neurobiol Aging* 24: 197-211 Doi 10.1016/s0197-4580(02)00065-9
- Hyman BT, Phelps CH, Beach TG, Bigio EH, Cairns NJ, Carrillo MC, Dickson DW, Duyckaerts C, Frosch MP, Masliah E et al (2012) National Institute on Aging-Alzheimer's Association guidelines for the neuropathologic assessment of Alzheimer's disease. *Alzheimers Dement* 8: 1-13 Doi 10.1016/j.jalz.2011.10.007
- Mirra SS, Heyman A, McKeel D, Sumi SM, Crain BJ, Brownlee LM, Vogel FS, Hughes JP, van Belle G, Berg L (1991) The Consortium to Establish a Registry for Alzheimer's Disease (CERAD). Part II. Standardization of the neuropathologic assessment of Alzheimer's disease. *Neurology* 41: 479-486 Doi 10.1212/wnl.41.4.479
- Montine TJ, Phelps CH, Beach TG, Bigio EH, Cairns NJ, Dickson DW, Duyckaerts C, Frosch MP, Masliah E, Mirra S et al (2012) National Institute on Aging-Alzheimer's Association guidelines for the neuropathologic assessment of Alzheimer's disease: a practical approach. *Acta Neuropathol* 123: 1-11 Doi 10.1007/s00401-011-0910-3
- Nelson PT, Dickson DW, Trojanowski JQ, Jack CR, Boyle PA, Arfanakis K, Rademakers R, Alafuzoff I, Attems J, Brayne C et al (2019) Limbic-predominant age-related TDP-43 encephalopathy (LATE): consensus working group report. *Brain* 142: 1503-1527 Doi 10.1093/brain/awz099
- Thal DR, Rub U, Orantes M, Braak H (2002) Phases of A beta-deposition in the human brain and its relevance for the development of AD. *Neurology* 58: 1791-1800 Doi 10.1212/wnl.58.12.1791
